# Supplementary material for: Alkali metal-sulfur dioxide complexes stabilized by halogenated closo-dodecaborate anions
Source: Royal Society of Chemistry journal article supplement (doi:10.1039/c0dt00521e), 2010-01-01
Supplement: c0dt00521e.pdf [file c0dt00521e.pdf]

*Supplementary Data*

*to*

Alkali Metal-Sulfur Dioxide Complexes Stabilized  
by Halogenated *closo*-Dodecaborate Anions

*Janis Derendorf,<sup>a</sup> Mathias Keßler,<sup>a</sup> Carsten Knapp,<sup>\*a</sup> Monika Rühle,<sup>a</sup> Christoph Schulz<sup>a</sup>*

<sup>a</sup> *Institut für Anorganische und Analytische Chemie, Albert-Ludwigs Universität Freiburg,  
Albertstr. 21, 79104 Freiburg i. Br., Germany. E-mail: carsten.knapp@ac.uni-freiburg.de;  
Fax: +49-761-203-6001; Tel: +49-761-203-6150.*

## 1. Quantumchemical calculations

**Table S1** Calculated (PBE0/def2-TZVPP) total energies and zero point energies (ZPE) for  $M(\text{OSO})^+$  ( $M = \text{Li}, \text{Na}, \text{K}, \text{Rb}, \text{Cs}$ )

| Compound                    | Total energy (a.u.) | ZPE (a.u.) | Total energy including ZPE (a.u.) |
|-----------------------------|---------------------|------------|-----------------------------------|
| $\text{Li}^+$               | -7.262402           | -          | -7.262402                         |
| $[\text{Li}(\text{OSO})]^+$ | -555.719199         | 0.008874   | -555.710324                       |
| $\text{Na}^+$               | -161.981343         | -          | -161.981343                       |
| $[\text{Na}(\text{OSO})]^+$ | -710.423337         | 0.008162   | -710.415175                       |
| $\text{K}^+$                | -599.578330         | -          | -599.578330                       |
| $[\text{K}(\text{OSO})]^+$  | -1148.011081        | 0.007927   | -1148.003154                      |
| $\text{Rb}^+$               | -23.927293          | -          | -23.927293                        |
| $[\text{Rb}(\text{OSO})]^+$ | -572.357386         | 0.007792   | -572.349594                       |
| $\text{Cs}^+$               | -19.996641          | -          | -19.996641                        |
| $[\text{Cs}(\text{OSO})]^+$ | -568.424466         | 0.007735   | -568.416731                       |
| $\text{SO}_2$               | -548.411377         | 0.007222   | -548.404155                       |

## 2. IR spectra of $[\text{Oct}_3\text{NH}]_2[\text{B}_{12}\text{X}_{12}]$ ( $\text{X} = \text{F} - \text{I}$ ) salts in the solid state

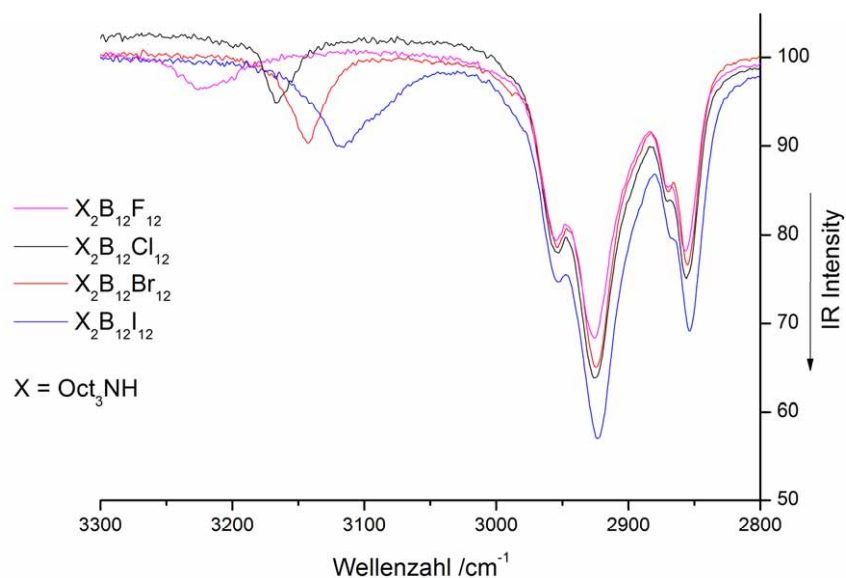

**Fig. S1.** IR spectra of  $[\text{Oct}_3\text{NH}]_2[\text{B}_{12}\text{X}_{12}]$  ( $\text{X} = \text{F} - \text{I}$ ) salts in the solid state

### 3. Structure figures

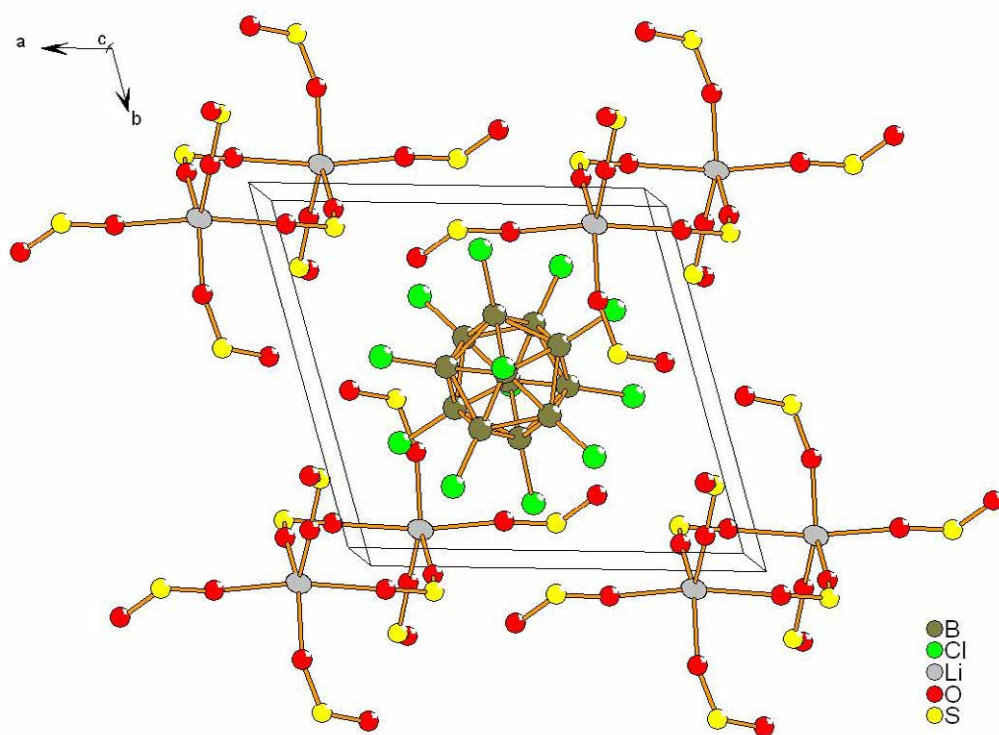

**Fig. S2.** Unit cell of  $[\text{Li}_2(\text{SO}_2)_8][\text{B}_{12}\text{Cl}_{12}]$

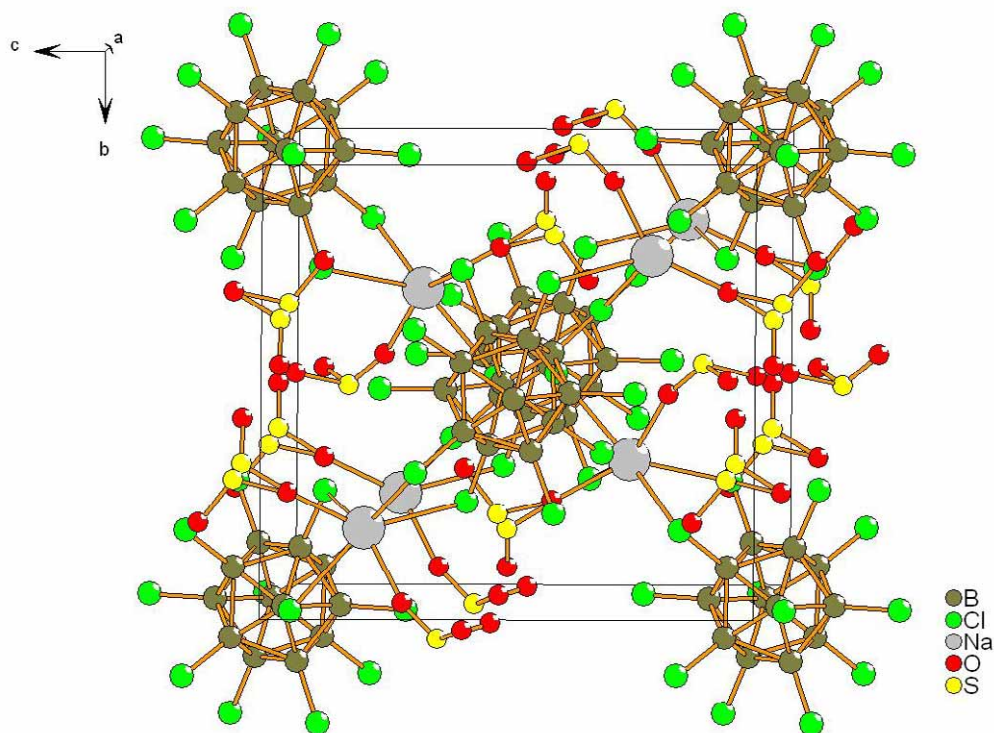

**Fig. S3.** Unit cell of  $\text{Na}_2[\text{B}_{12}\text{Cl}_{12}] \cdot 4\text{SO}_2$

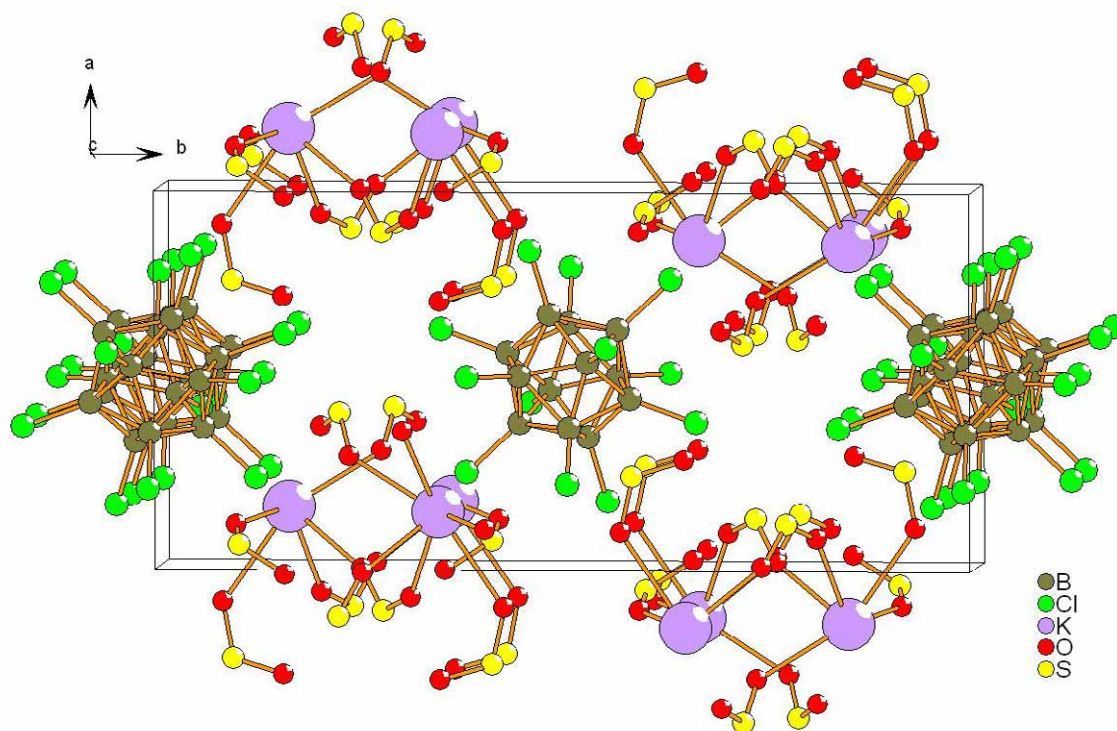

**Fig. S4.** Unit cell of  $K_2[B_{12}Cl_{12}] \cdot 8SO_2$

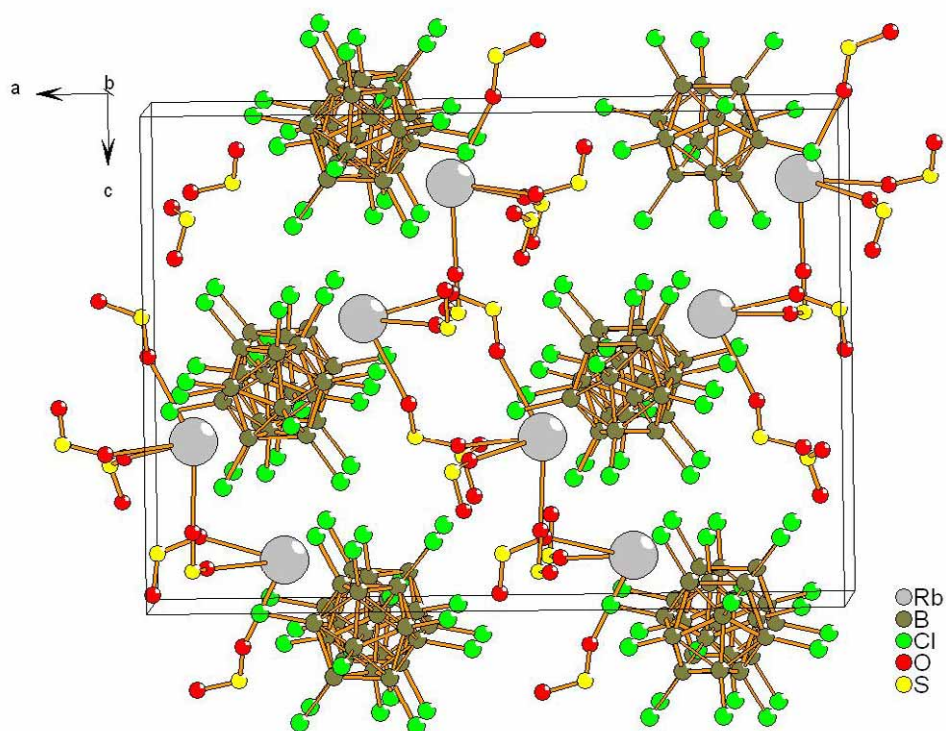

**Fig. S5.** Unit cell of  $Rb_2[B_{12}Cl_{12}] \cdot 4SO_2$



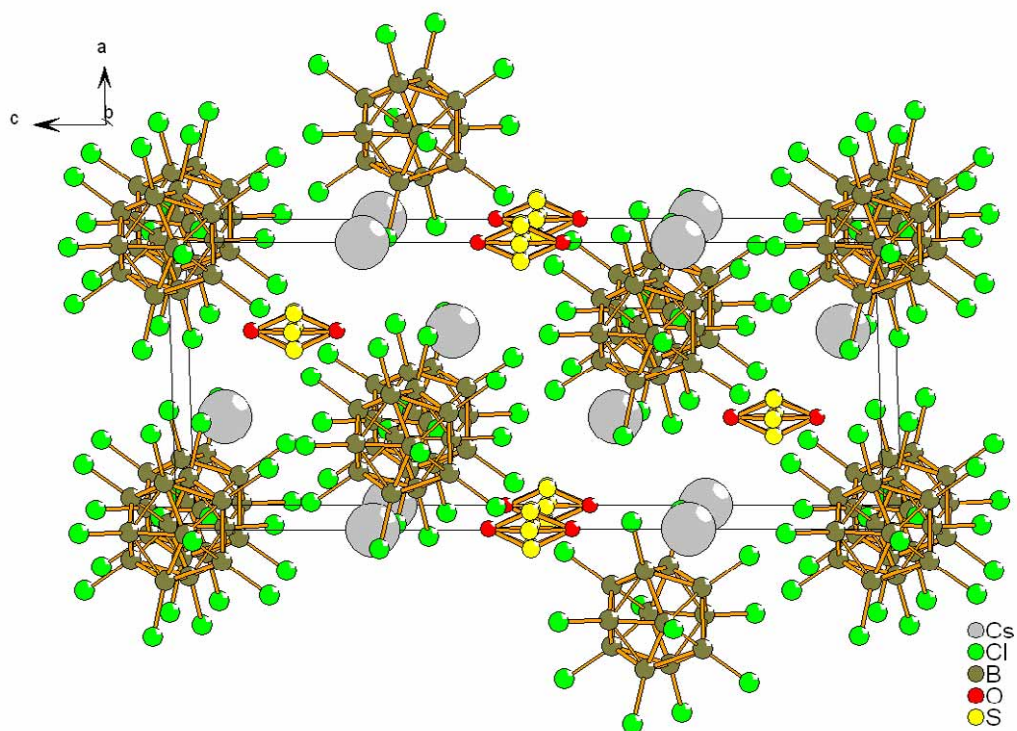

**Fig. S6.** Unit cell of  $\text{Cs}_2[\text{B}_{12}\text{Cl}_{12}]\cdot\text{SO}_2$

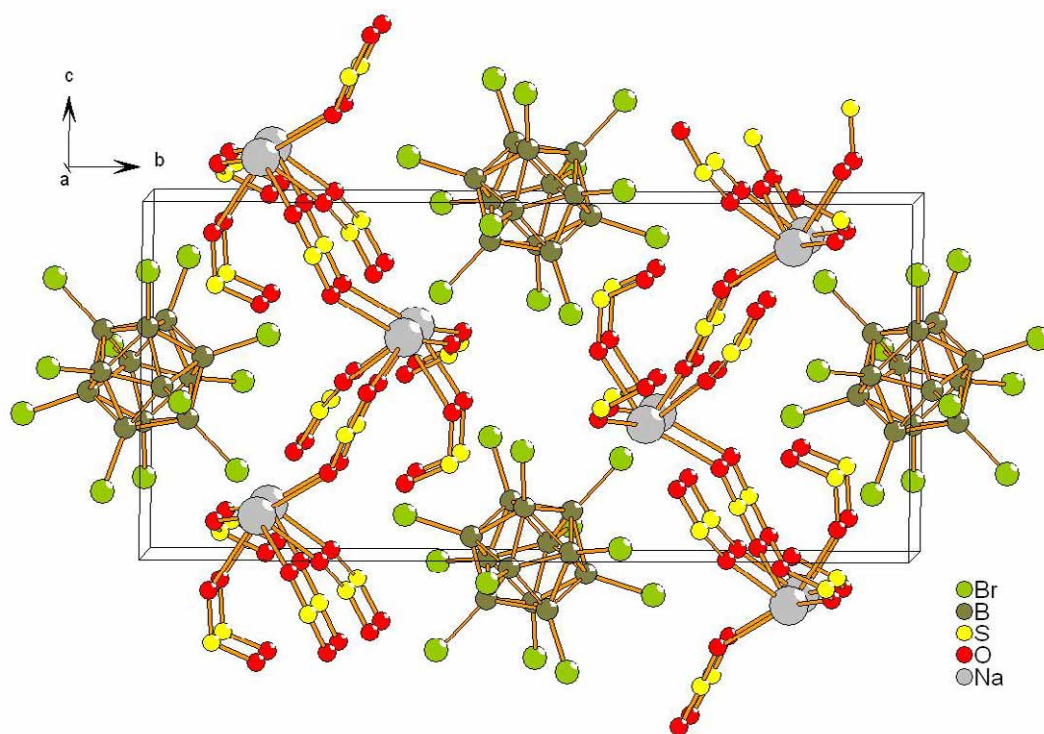

**Fig. S7.** Unit cell of  $\text{Na}_2[\text{B}_{12}\text{Br}_{12}]\cdot 8\text{SO}_2$

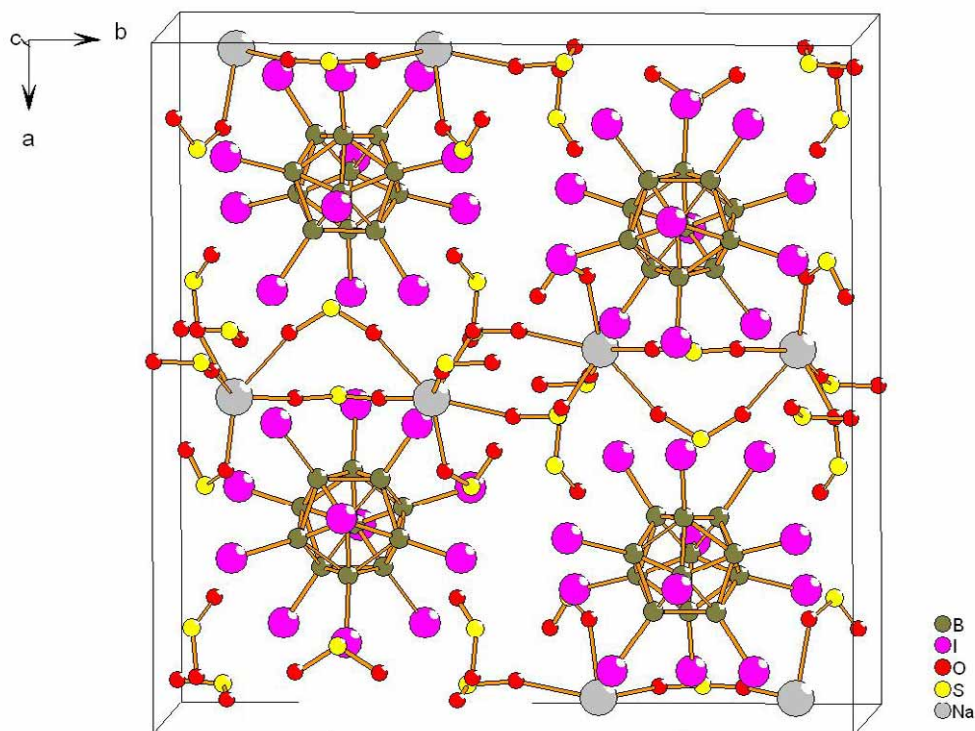

**Fig. S8.** Unit cell of Na<sub>2</sub>[B<sub>12</sub>I<sub>12</sub>]·8SO<sub>2</sub>

#### 4. Structure of Na<sub>2</sub>[B<sub>12</sub>H<sub>12</sub>]·6SO<sub>2</sub>·2H<sub>2</sub>O and Na<sub>2</sub>[B<sub>12</sub>I<sub>12</sub>]·8SO<sub>2</sub>·H<sub>2</sub>O

The parent compound Na<sub>2</sub>[B<sub>12</sub>H<sub>12</sub>] cannot be dried with SOCl<sub>2</sub> in order to avoid chlorination of the boron cluster. Therefore Na<sub>2</sub>[B<sub>12</sub>H<sub>12</sub>]·6SO<sub>2</sub>·2H<sub>2</sub>O has crystallized with two molecules of water (Fig. S9). Figure S10 shows the crystal structure of Na<sub>2</sub>[B<sub>12</sub>I<sub>12</sub>]·8SO<sub>2</sub>·H<sub>2</sub>O containing one water molecule. The influence of the coordinated water molecule on the overall structure in this case is small as can be seen from comparison of the structures of Na<sub>2</sub>[B<sub>12</sub>I<sub>12</sub>]·8SO<sub>2</sub> (Fig. 8, main text) and Na<sub>2</sub>[B<sub>12</sub>I<sub>12</sub>]·8SO<sub>2</sub>·H<sub>2</sub>O (Fig. S10). Both structures contain similar chains of Na<sup>+</sup> bridged by SO<sub>2</sub> molecules. The larger [B<sub>12</sub>I<sub>12</sub>]<sup>2-</sup> anion is able to bridge two Na<sup>+</sup> cations and coordinates to both cations in a η<sup>2</sup> fashion. The small parent anion [B<sub>12</sub>H<sub>12</sub>]<sup>2-</sup> is significantly different from the halogenated anions. It does not form any contacts to the Na<sup>+</sup> cation. The Na<sup>+</sup> cations in Na<sub>2</sub>[B<sub>12</sub>H<sub>12</sub>]·6SO<sub>2</sub>·2H<sub>2</sub>O are connected by bridging SO<sub>2</sub> and H<sub>2</sub>O molecules to give a three-dimension network. Water is a much stronger donor than SO<sub>2</sub> as evident from the Na-O distances (Na<sub>2</sub>[B<sub>12</sub>H<sub>12</sub>]·6SO<sub>2</sub>·2H<sub>2</sub>O: av. Na-OSO 252 pm, Na-OH<sub>2</sub> 236 pm; Na<sub>2</sub>[B<sub>12</sub>I<sub>12</sub>]·8SO<sub>2</sub>·H<sub>2</sub>O: av. Na-OSO 246 pm, Na-OH<sub>2</sub> 221 pm).

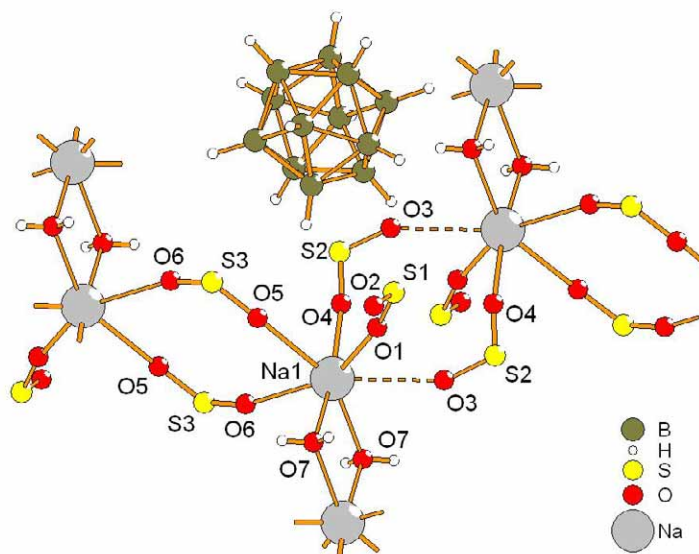

**Fig. S9.** Section of the crystal structure of  $\text{Na}_2[\text{B}_{12}\text{H}_{12}]\cdot 6\text{SO}_2\cdot 2\text{H}_2\text{O}$ . Selected distances [pm] and angles [°]: Na1-O1 242.25(15), Na1-O3 274.5(2), Na1-O4 234.50(15), Na1-O5 251.35(15), Na1-O6 262.10(17), Na1-O7 236.43(15), O-S 140.96(13)-142.18(13), O-S-O 116.72(9)-117.98(8).

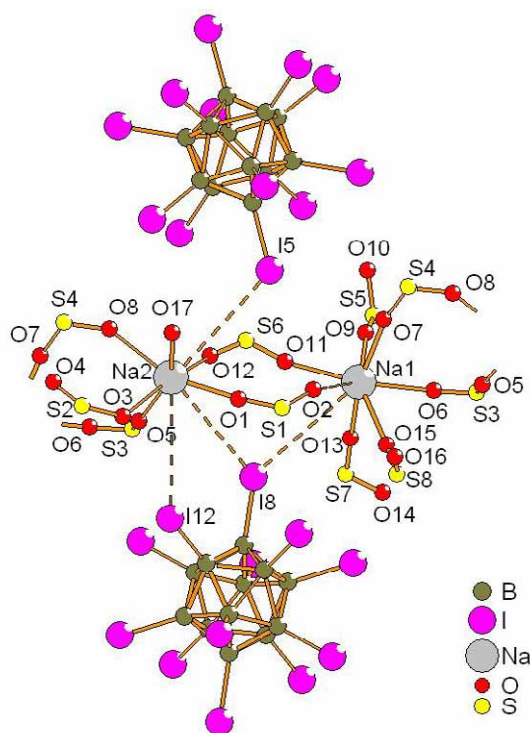

**Fig. S10.** Section of the crystal structure of  $\text{Na}_2[\text{B}_{12}\text{I}_{12}]\cdot 8\text{SO}_2\cdot \text{H}_2\text{O}$ . The hydrogen atoms belonging to the water molecule were not found from the electron density map. Selected



distances [pm] and angles [°]: Na1-O2 284.1(13), Na1-O6 240.7(11), Na1-O7 235.6(10), Na1-O9 252.9(11), Na1-O11 237.5(11), Na1-O13 236.9(11), Na1-O15 251.8(11), Na2-O1 232.6(14), Na2-O3 232.6(14), Na2-O5 231.9(13), Na2-O8 259.1(14), Na1-O12 252.2(12), Na1-O17 221.2(14), Na1-I8 437.8(6), Na2-I5 451.6(7), Na2-I7 435.3(7), Na2-I12 445.5(8), O-S 138.6(11)-144.7(10), O-S-O 116.0(7)-119.7(7).

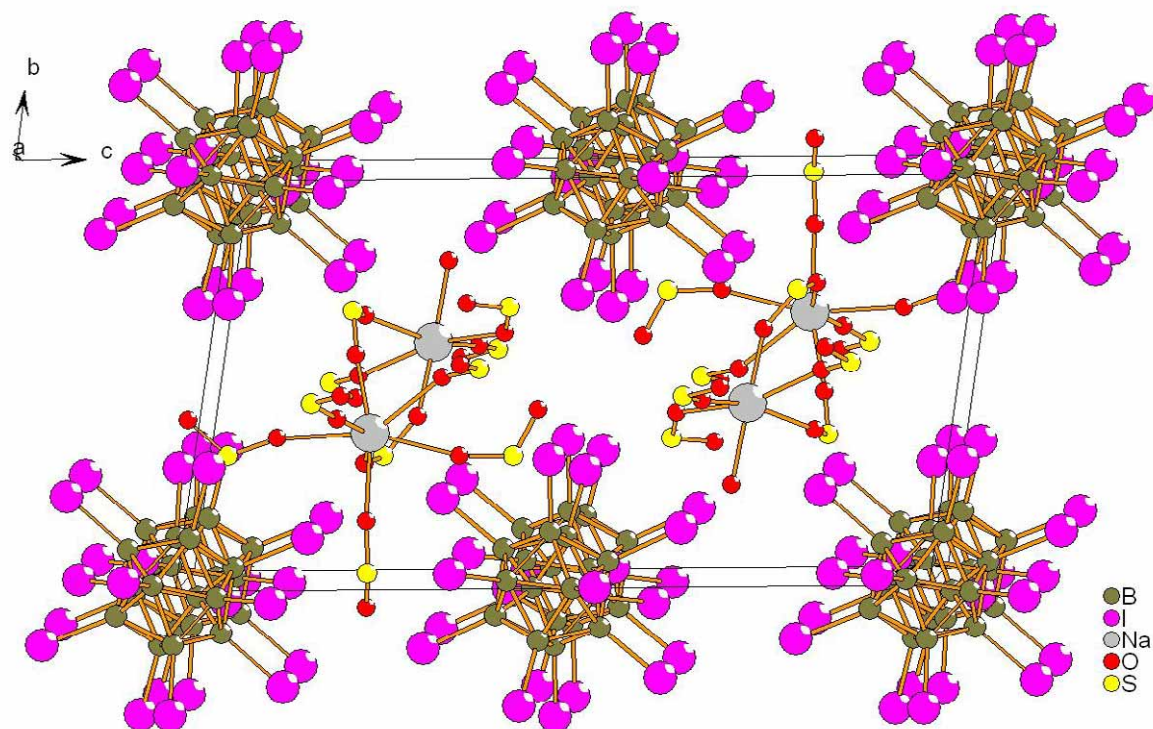

**Fig. S11.** Unit cell of Na<sub>2</sub>[B<sub>12</sub>I<sub>12</sub>]·8SO<sub>2</sub>·H<sub>2</sub>O



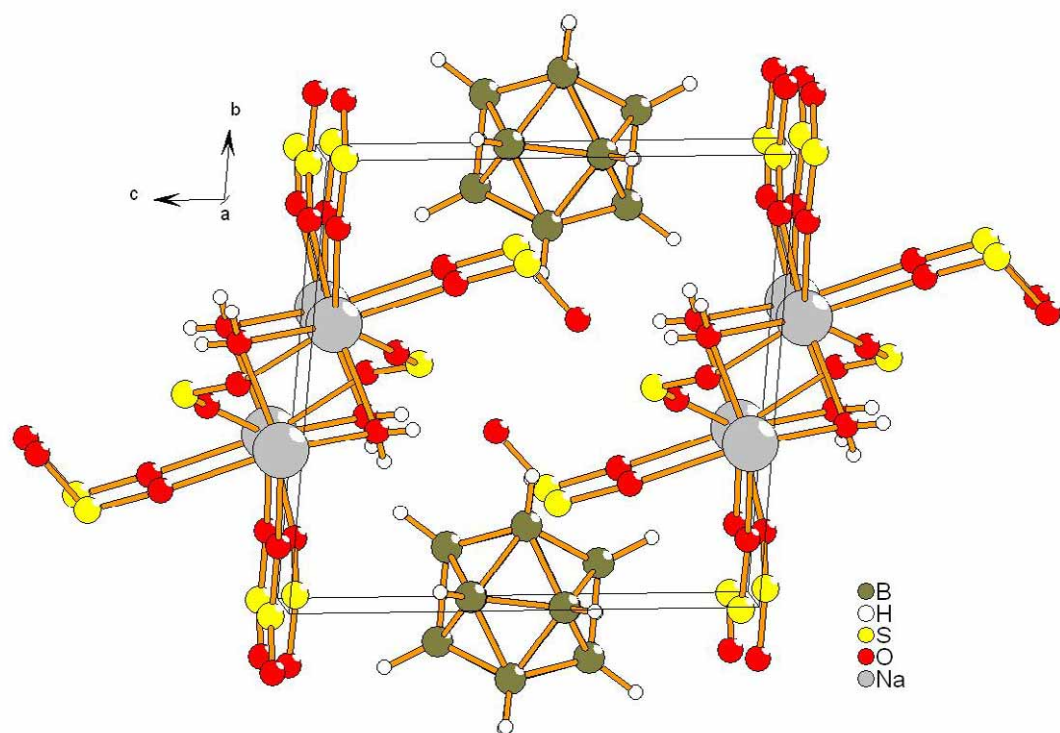

**Fig. S12.** Unit cell of  $\text{Na}_2[\text{B}_{12}\text{H}_{12}] \cdot 6\text{SO}_2 \cdot 2\text{H}_2\text{O}$
